# Supplementary material
Source: PubMed Central journal article supplement (PMC5795088)
Supplement: AEM.02000-17_zam004188327s1.pdf [file AEM.02000-17_zam004188327s1.pdf]

**TABLE S1** Characteristics and management practices of the investigated dairy farms

| Factor                  | Farm A          | Farm B          | Farm C          |
|-------------------------|-----------------|-----------------|-----------------|
| Herd size               | 20              | 40              | 60              |
| Milking system          | Parlour         | Parlour         | Automatic       |
| Barn structure          | Open air        | Heat-insulated  | Heat-insulated  |
| Housing system          | Bedded pack     | Free-stall      | Free-stall      |
| Bedding material        | Peat, straw     | Peat            | Sawdust, sand   |
| Stall mats              | NA <sup>a</sup> | Rubber mat/pad  | Pasture gel mat |
| Manure passage type     | Concrete        | grid            | concrete        |
| Feces removal system    | shovel          | mechanic scrape | mechanic scrape |
| Roughage feeding system | feed table      | feed table      | feed troughs    |
| Farming system          | organic         | conventional    | conventional    |

<sup>a</sup>NA, not applicable; the resting area is not divided into stalls

**TABLE S2** Proportion of *Listeria monocytogenes* positive 50 ml-aliquots in 250-ml composite bulk tank milk samples collected from farms A–C.

| Proportion of positive aliquots | MPN [CI 95%] <sup>a</sup><br>(cfu/ml) | Farm A         |                | Farm B |    | Farm C |    |
|---------------------------------|---------------------------------------|----------------|----------------|--------|----|--------|----|
|                                 |                                       | n <sup>b</sup> | % <sup>c</sup> | n      | %  | n      | %  |
| 0/5                             | 0 [0–0.03]                            | 63             | 84             | 51     | 86 | 47     | 90 |
| 1/5                             | 0.01 [0.001–0.07]                     | 8              | 11             | 4      | 7  | 4      | 8  |
| 2/5                             | 0.02 [0.005–0.03]                     | 0              | 0              | 4      | 7  | 1      | 2  |
| 3/5                             | 0.04 [0.01–0.1]                       | 2              | 3              | 0      | 0  | 0      | 0  |
| 4/5                             | 0.07 [0.02–0.2]                       | 1              | 1              | 0      | 0  | 0      | 0  |
| 5/5                             | > 0.07 [NA <sup>d</sup> ]             | 1              | 1              | 0      | 0  | 0      | 0  |

<sup>a</sup> MPN [CI 95%]: Most probable number of *L. monocytogenes* in the sampled bulk tank milk and 95 % confidence limits, derived from the number of aliquots positive for *L. monocytogenes* after enrichment

<sup>b</sup> n: number of composite bulk tank milk samples

<sup>c</sup> %: percentage of composite bulk tank milk samples

<sup>d</sup> NA: not applicable; the confidence limit is incalculable

**TABLE S3** Comparison of hygiene scores and *L. monocytogenes* prevalences on farms A–C. For each evaluated and sampled site, the three farms were ranked based on hygiene scores and *L. monocytogenes* prevalence: the highest hygiene score was ranked first, and the lowest hygiene score was ranked third; the lowest prevalence was ranked first, and the highest prevalence was ranked third

| Evaluated site  | Sampled site             | Farm A              |                    | Farm B  |        | Farm C  |        |
|-----------------|--------------------------|---------------------|--------------------|---------|--------|---------|--------|
|                 |                          | HS (R) <sup>a</sup> | % (R) <sup>b</sup> | HS (R)  | % (R)  | HS (R)  | % (R)  |
| Milk room       | Milk room floor          | 3 (1)               | 36 (1)             | 3 (1)   | 45 (1) | 2.5 (3) | 46 (3) |
| Milking station | Milking station floor    | 1 (3)               | 58 (2)             | 3 (1)   | 26 (1) | 2 (2)   | 69 (3) |
| Waiting area    | Waiting area floor       | 1 (3)               | 64 (2)             | 3 (1)   | 36 (1) | 1.5 (2) | 67 (3) |
| Resting area    | Bedding                  | 2 (3)               | 38 (3)             | 3 (1)   | 5 (1)  | 3 (1)   | 15 (2) |
| Cow cleanliness | Udder surface            | 2 (3)               | 31 (3)             | 3 (1)   | 4 (2)  | 3 (1)   | 0 (1)  |
| Feed troughs    | Feed trough surface      | 1.5 (3)             | 31 (3)             | 2 (2)   | 24 (2) | 3 (1)   | 16 (1) |
| Water troughs   | Water trough surface     | 2 (3)               | 29 (2)             | 3 (1)   | 19 (1) | 3 (1)   | 31 (3) |
| Total score     | Environmental prevalence | 1.7 (3)             | 21 (3)             | 2.8 (1) | 10 (1) | 2.6 (2) | 17 (2) |

<sup>a</sup> HS (R): Hygiene score and ranking

<sup>b</sup> % (R): *L. monocytogenes* prevalence and ranking

**TABLE S4** Risk estimate for the detection of *Listeria monocytogenes* genotypes in bulk tank milk samples when detected in other sampling sites

| Sampling site               | Fisher's Exact Test | RR [CI 95%] <sup>a</sup> |
|-----------------------------|---------------------|--------------------------|
| Milking system <sup>b</sup> | p<0.000             | 7.29 [4.48–11.85]        |
| Udders & udder wipes        | NS <sup>c</sup>     | 2.58 [1.11–5.98]         |
| Feed surfaces               | NS                  | 2.01 [0.87–4.63]         |
| Milking station floor       | NS                  | 1.96 [0.88–4.37]         |
| Holding pen floor           | NS                  | 1.78 [0.69–4.58]         |
| Bedding                     | NS                  | 1.77 [0.69–4.58]         |
| Feed                        | NS                  | 1.77 [0.73–4.29]         |
| Water troughs               | NS                  | 1.43 [0.62–3.29]         |
| Milk room floor             | NS                  | 1.41 [0.53–3.74]         |
| Feces                       | NS                  | 0.83 [0.30–2.28]         |

<sup>a</sup>RR [CI 95%]: relative risk and the 95% confidence interval

<sup>b</sup>Milking system: milk filter tube, milk collector, milk tank outlet, teat cups and rinse water from the milking line

<sup>c</sup>NS: not significant at the 95% confidence level

**TABLE S5** Risk estimate for the detection of *Listeria monocytogenes* genotypes in milk filter socks by genotypes when detected in other sampling sites

| Sampling site               | Fisher's Exact Test | RR [CI 95%] <sup>a</sup> |
|-----------------------------|---------------------|--------------------------|
| Udders & udder wipes        | p=0.003             | 2.41 [1.59–3.67]         |
| Milking system <sup>b</sup> | NS <sup>c</sup>     | 2.27 [1.36–3.78]         |
| Bedding                     | NS                  | 1.41 [0.78–2.55]         |
| Milk room floor             | NS                  | 1.41 [0.53–3.74]         |
| Feed surfaces               | NS                  | 1.26 [0.72–2.21]         |
| Holding pen floor           | NS                  | 1.12 [0.60–3.48]         |
| Milking station floor       | NS                  | 1.07 [0.51–1.59]         |
| Feed                        | NS                  | 0.97 [0.65–1.99]         |
| Water troughs               | NS                  | 0.93 [0.53–1.62]         |
| Feces                       | NS                  | 0.45 [0.20–1.86]         |

<sup>a</sup>RR [CI 95%]: relative risk and the 95% confidence interval

<sup>b</sup>Milking system: includes milk filter tube, milk collector, milk tank outlet, teat cups and rinse water from the milking line

<sup>c</sup>NS: not significant at the 95% confidence level

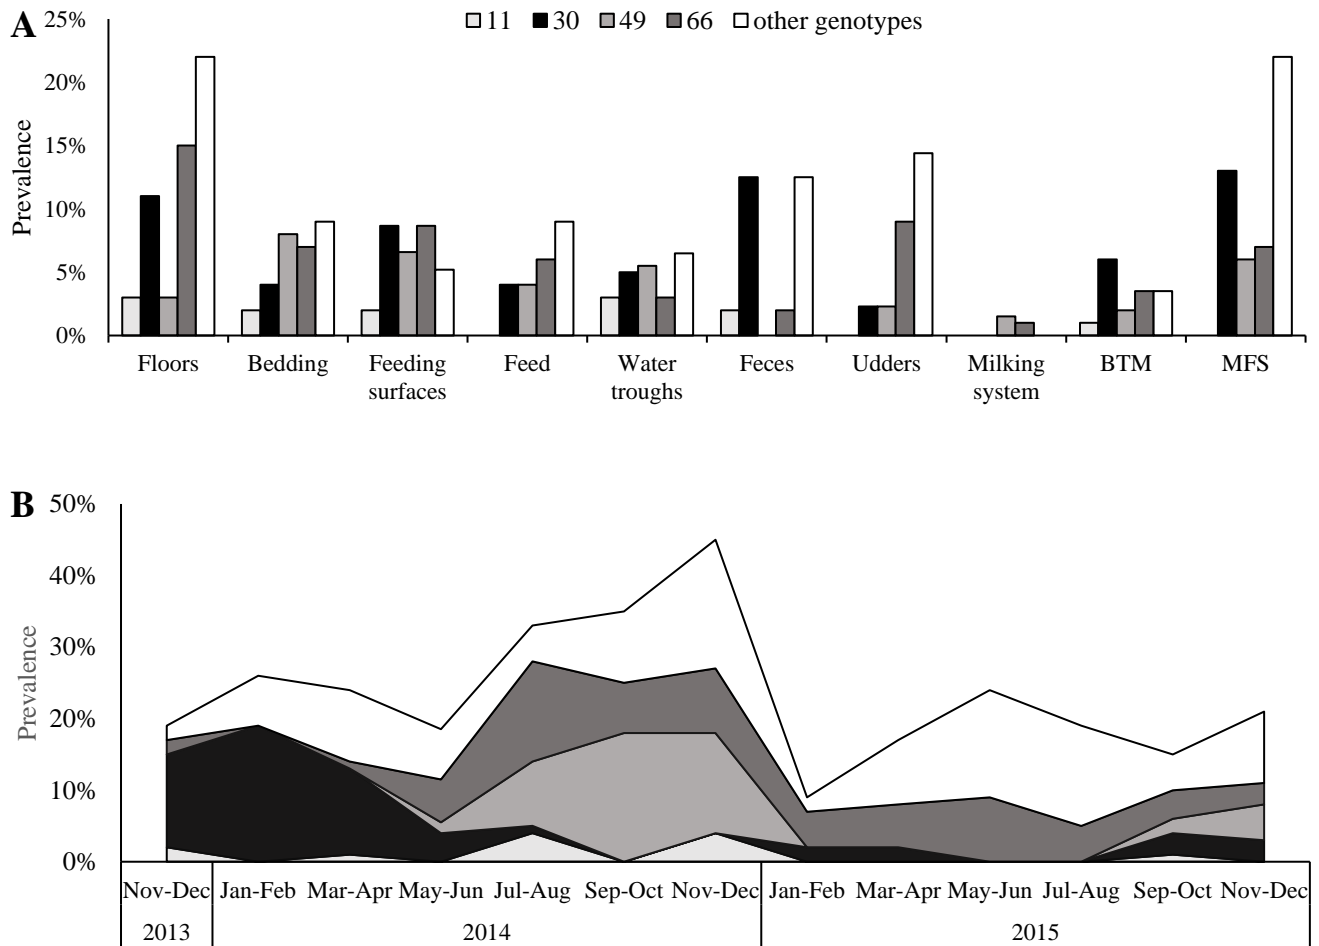

**FIG. S1** Prevalence of persistent predominant genotypes (11, 30, 49, 66) and other *L. monocytogenes* genotypes on farm A by sampling site (A) and season (B). Samples of bulk tank milk (BTM) and milk filter socks (MFS) were collected in 75 samplings conducted every 1–2 weeks, and samples of the farm environment were collected in 13 bimonthly samplings, from November 2013 to November 2015.

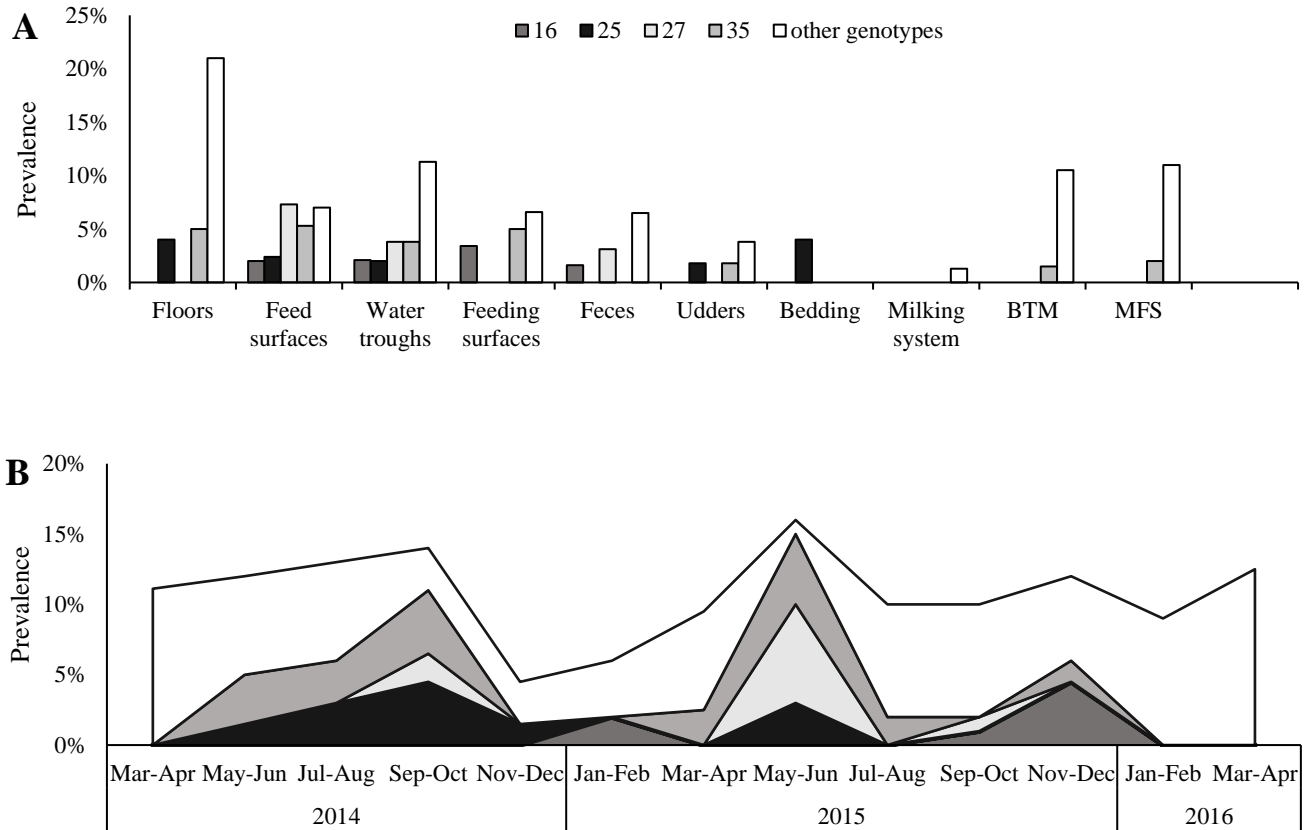

**FIG. S2** Prevalence of persistent predominant genotypes (16, 25, 27, 35) and other *L. monocytogenes* genotypes on farm B by sampling site (A) and season (B). Samples of bulk tank milk (BTM) and milk filter socks (MFS) were collected in 59 biweekly samplings, and samples of the farm environment were collected in 13 bimonthly samplings, from April 2014 to April 2016.

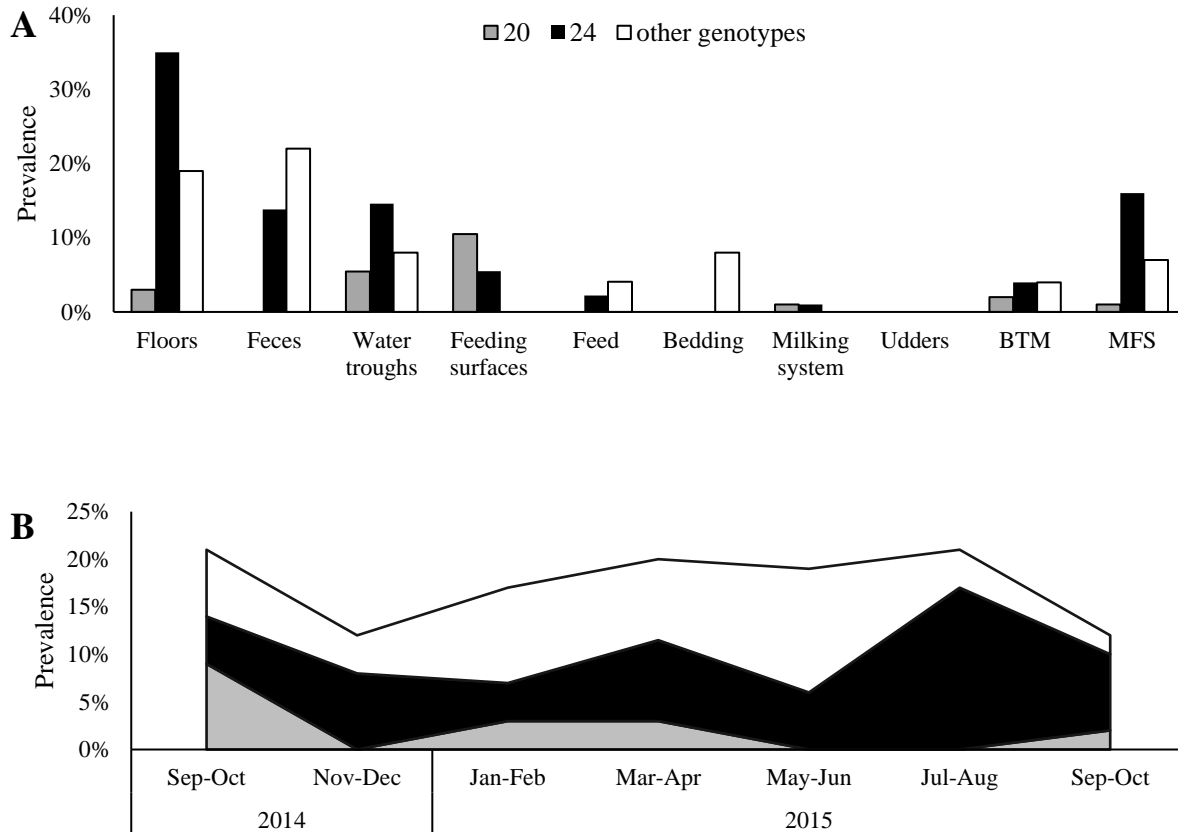

**FIG. S3** Prevalence of persistent predominant genotypes (20, 24) and other *L. monocytogenes* genotypes on farm C by sampling site (A) and season (B). Samples of bulk tank milk (BTM) and milk filter socks (MFS) were collected in 54 weekly samplings, and samples of the farm environment were collected in 7 bimonthly samplings, from September 2014 to September 2015.



|                       | BTM & MFS | Milking system | Udders | Bedding | Feeding surfaces | Feed   | Waiting area floor | Milk room floor | Water troughs | Milking station floor | Feces  |
|-----------------------|-----------|----------------|--------|---------|------------------|--------|--------------------|-----------------|---------------|-----------------------|--------|
| BTM & MFS             |           | p<0.05         | p<0.05 | NS      | NS               | NS     | NS                 | NS              | NS            | NS                    | NS     |
| Milking system        | p<0.05    |                | NS     | NS      | p<0.01           | NS     | NS                 | NS              | p<0.01        | p<0.05                | NS     |
| Udders                | p<0.05    | NS             |        | p<0.01  | NS               | p<0.05 | p<0.05             | NS              | p<0.05        | NS                    | NS     |
| Bedding               | NS        | NS             | p<0.01 |         | p<0.01           | p<0.05 | p<0.05             | p<0.01          | p<0.01        | NS                    | p<0.05 |
| Feeding surfaces      | NS        | p<0.01         | NS     | p<0.01  |                  | p<0.01 | p<0.01             | p<0.01          | p<0.01        | p<0.01                | p<0.01 |
| Feed                  | NS        | NS             | p<0.05 | p<0.05  | p<0.01           |        | NS                 | NS              | p<0.05        | NS                    | NS     |
| Waiting area floor    | NS        | NS             | p<0.05 | p<0.05  | p<0.01           | NS     |                    | p<0.01          | p<0.01        | NS                    | NS     |
| Milk room floor       | NS        | NS             | NS     | p<0.01  | p<0.01           | NS     | p<0.01             |                 | p<0.05        | NS                    | NS     |
| Water troughs         | NS        | p<0.01         | p<0.05 | p<0.01  | p<0.01           | p<0.05 | p<0.01             | p<0.05          |               | p<0.05                | p<0.05 |
| Milking station floor | NS        | p<0.05         | NS     | NS      | p<0.01           | NS     | NS                 | NS              | p<0.05        |                       | p<0.05 |
| Feces                 | NS        | NS             | NS     | p<0.05  | p<0.01           | NS     | NS                 | NS              | p<0.05        | p<0.05                |        |

**FIG. S4** Heat map of Fisher’s exact test results describing associations in the prevalence of *L. monocytogenes* genotypes between different sampling sites in the farm environment, bulk tank milk (BTM) and milk filter socks (MFS). Dark gray cells marked with “NS” indicate that the association was not statistically significant ( $p \geq 0.05$ ), gray cells marked with “ $p < 0.05$ ” indicate that the association was significant ( $0.01 \leq p < 0.05$ ), and light gray cells marked with “ $p < 0.01$ ” indicate that the association was highly significant ( $p < 0.01$ ). Water through samples include both surface swab and water samples. Feeding surfaces include feed troughs (farms A–C) and feed tables (farms A and B). Udder samples include surface swab samples of uncleaned udders and used udder wipes, and samples of the milking system include surface swab samples of the milk filter tube, milk collector, milk tank outlet, teat cups and rinse water from the milking line.

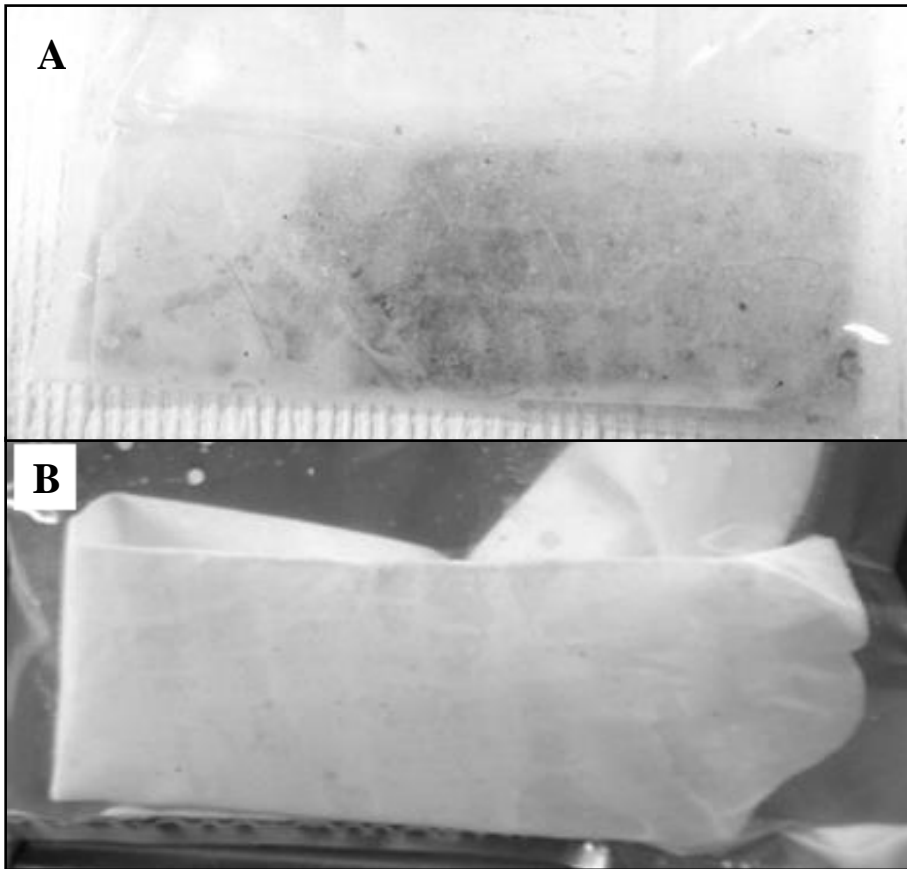

**FIG. S5** Visual inspection of the in-line milk filter socks. A: Milk filter sock with copious visible debris, obtained from farm A. B: Milk filter sock with little visible debris, obtained from farm B.

## Appendix S1.

### Survey of deviations in farm routines prior to bulk tank milk and filter sock sampling

Instructions: Fill this survey at each milk and filter sock sampling to report any deviations from normal farm routines during the seven days preceding the date of sampling.

Name of the farm:

Date:

1. Were any abnormalities in animal health observed during the past week? Yes  / No 
  - If yes, what?
2. Were there any changes to farm staff or working routines during the past week (employment of new staff, substitute workers, etc.)? Yes  / No 
  - If yes, what?
3. Were any new animals purchased to the farm during the past week? Yes  / No 
  - If yes, what animals and how many?
4. Were any non-routine cleaning procedures or maintenance operations performed at the farm during the last week? Yes  / No 
  - If yes, what?
5. Were there any changes in feeding or feed quality during the past week? Yes  / No 
  - If yes, what?
6. Were there any visitors to the farm during the past week? Yes  / No 
  - If yes, describe the purpose of the visit:
7. Observations regarding sampling:
8. Additional comments:
